# Supplementary material
Source: ML conference proceedings conference paper supplement (https://openreview.net/forum?id=hks0UrZ06N)

## OOD Ensemble

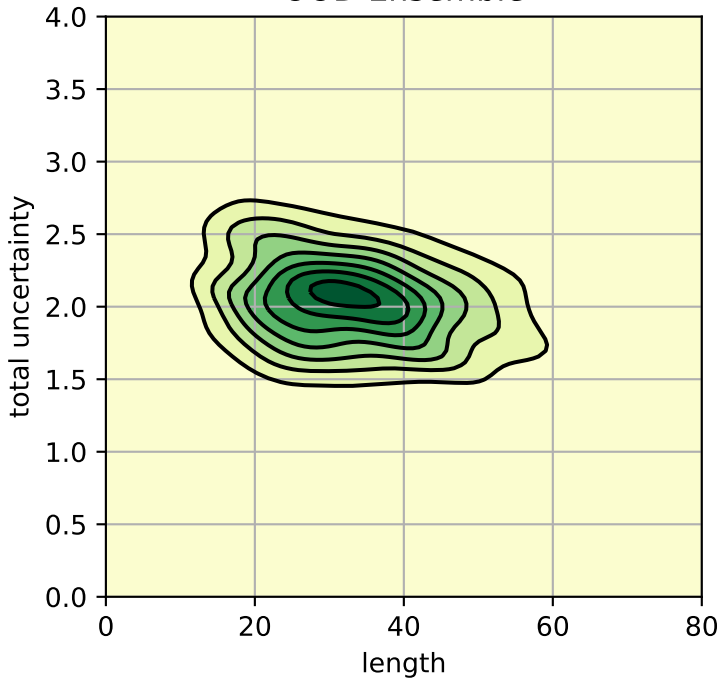

Supplement: supplementary_material [file attachment]

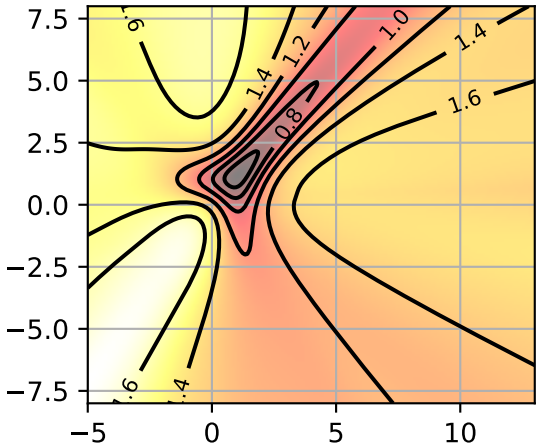

Supplement: supplementary_material [file attachment]

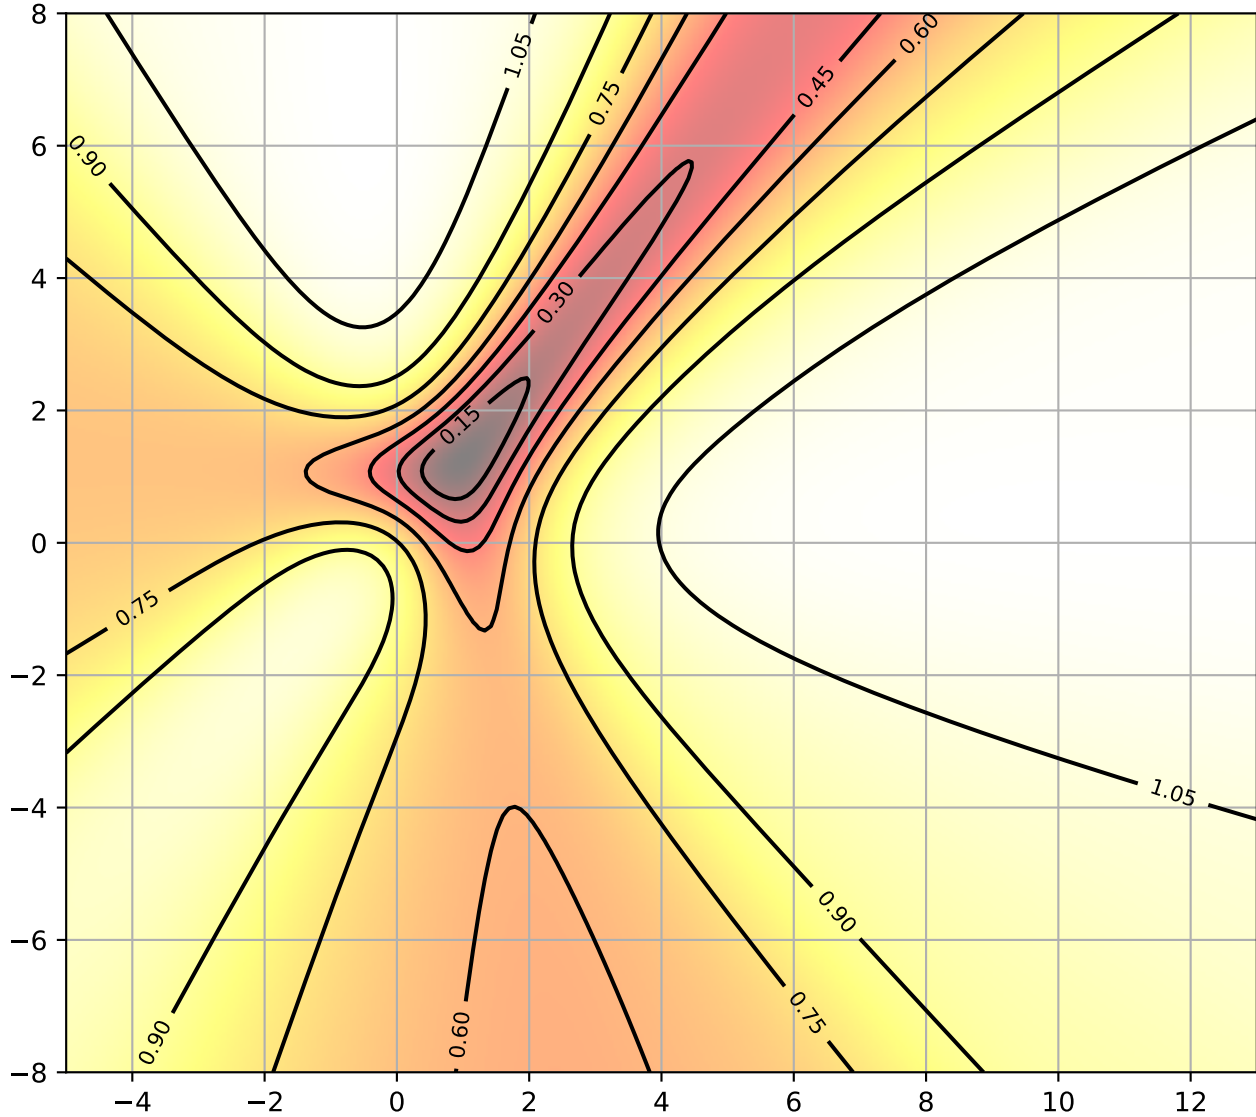

Supplement: supplementary_material [file attachment]

OOD Laplace

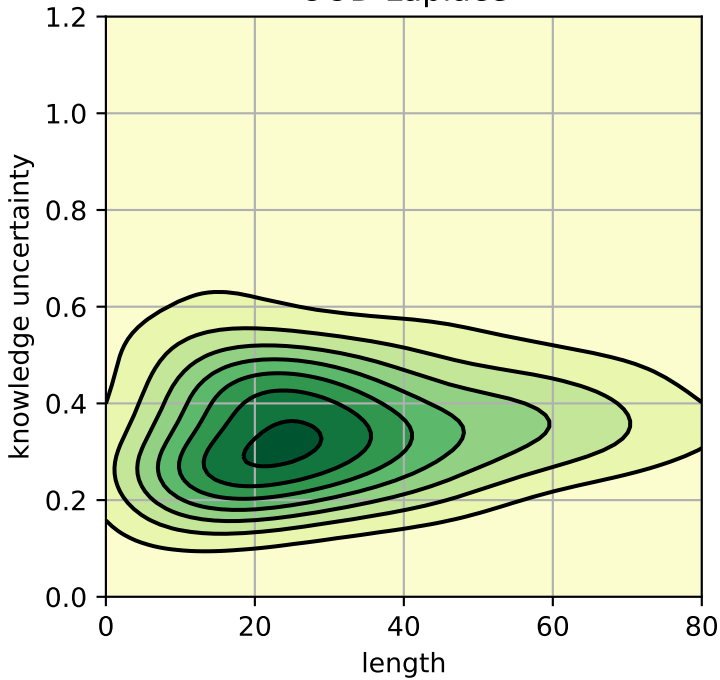

Supplement: supplementary_material [file attachment]

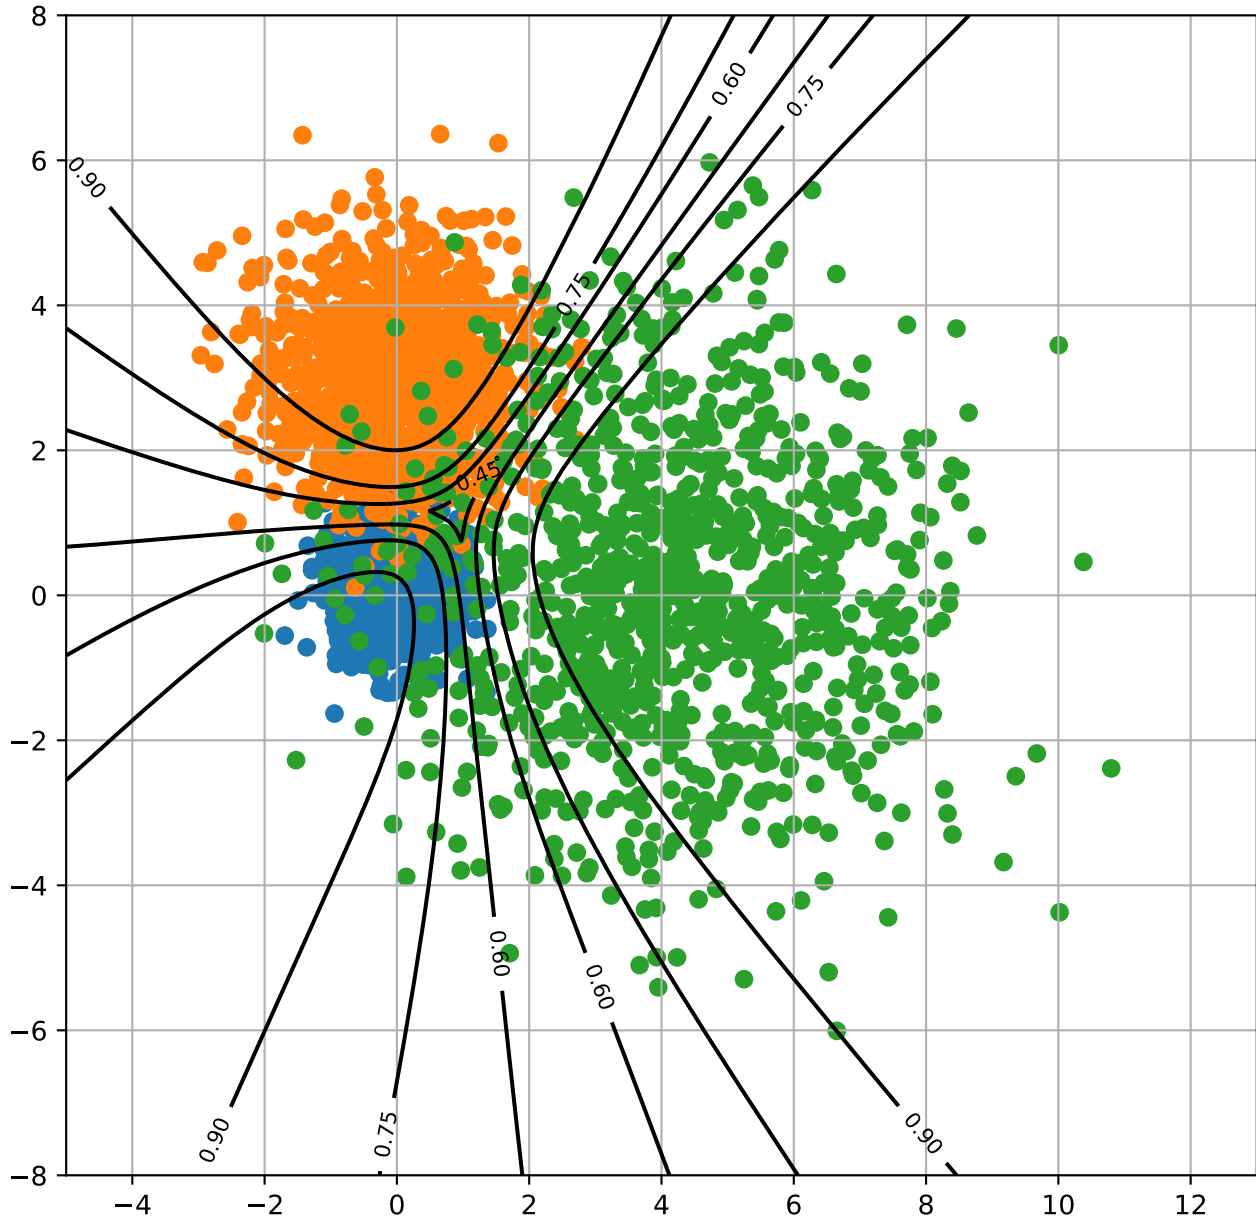

Supplement: supplementary_material [file attachment]

ID Laplace

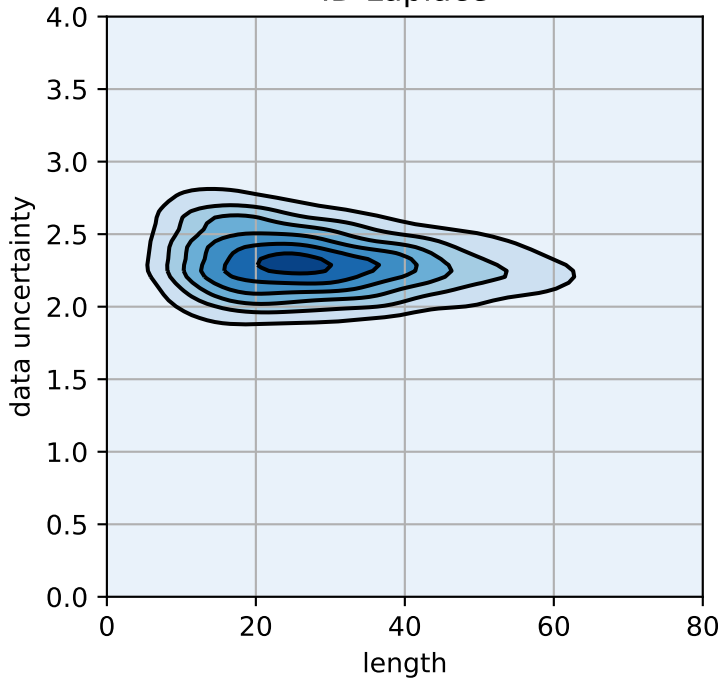

Supplement: supplementary_material [file attachment]

OOD Laplace

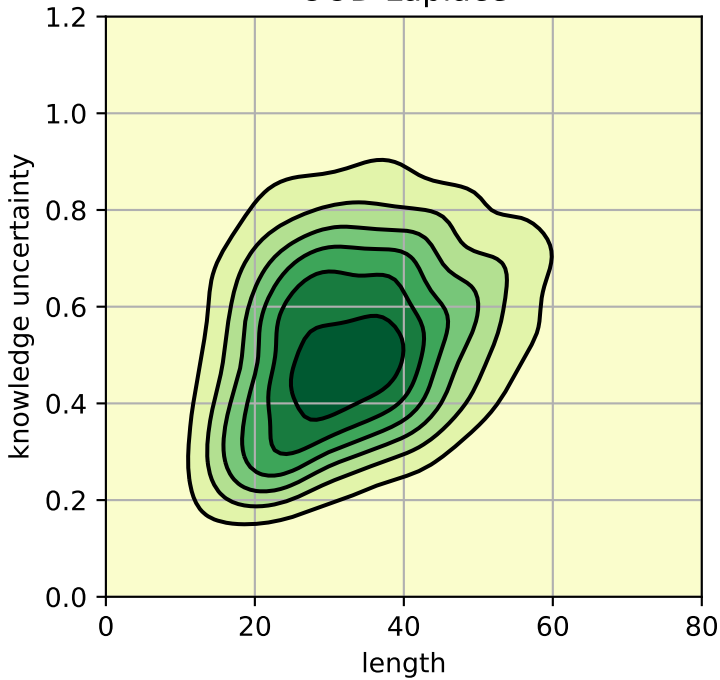

Supplement: supplementary_material [file attachment]

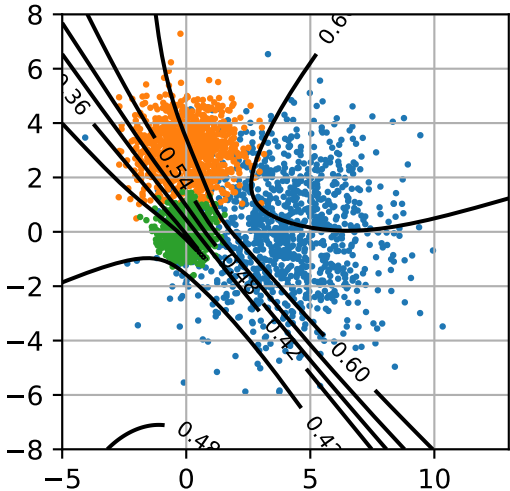

Supplement: supplementary_material [file attachment]

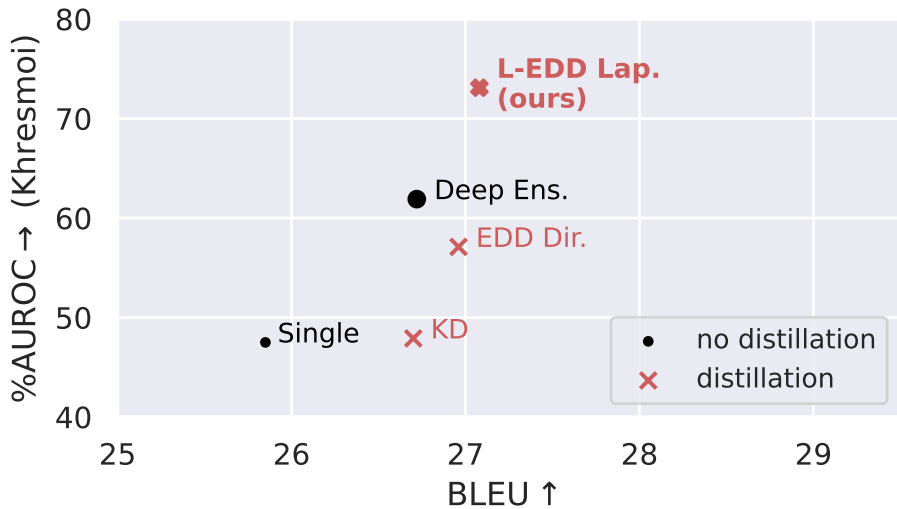

Supplement: supplementary_material [file attachment]

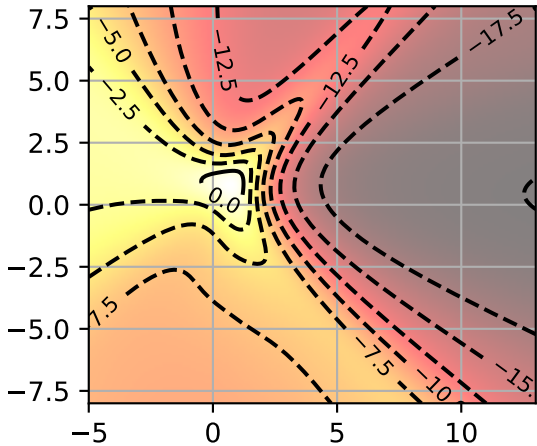

Supplement: supplementary_material [file attachment]

OOD Ensemble

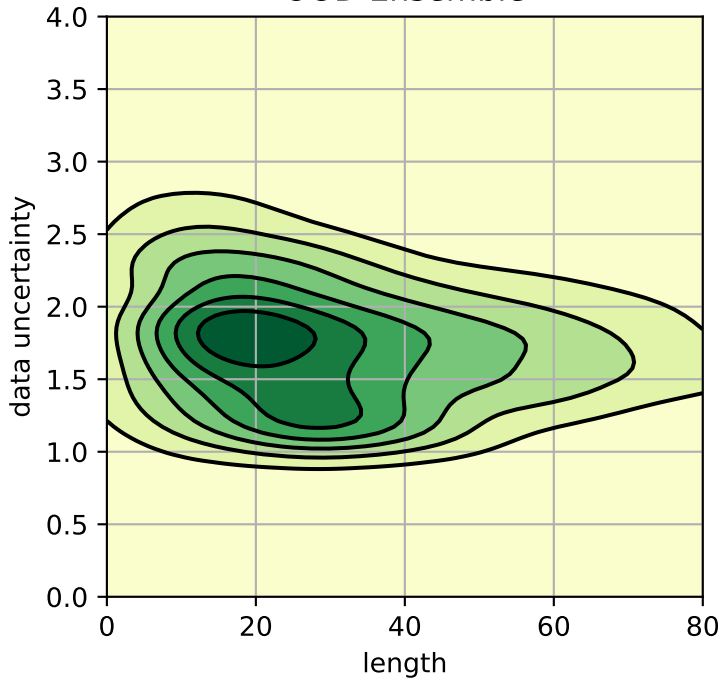

Supplement: supplementary_material [file attachment]

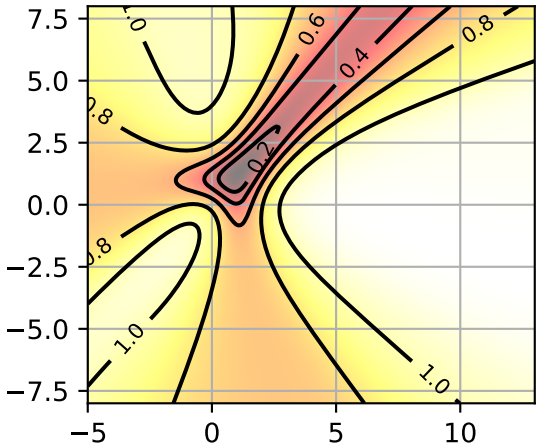

Supplement: supplementary_material [file attachment]

OOD Laplace

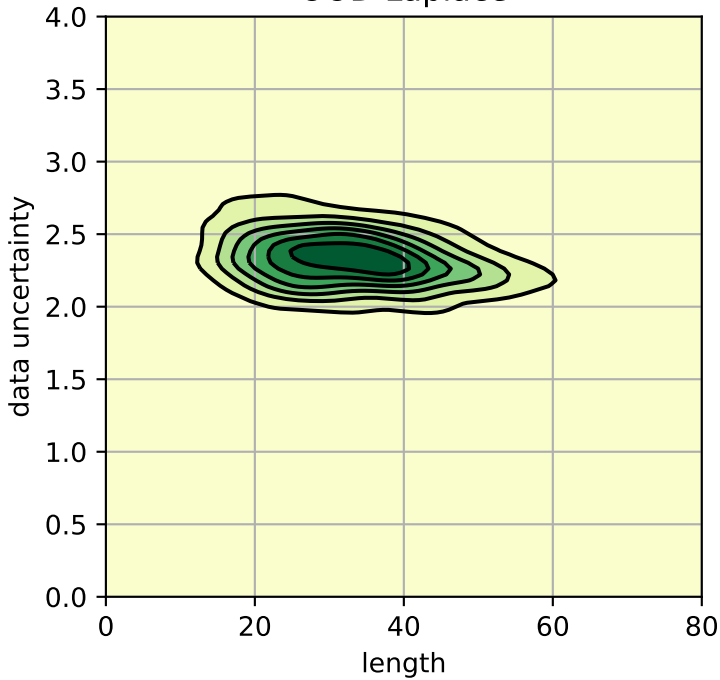

Supplement: supplementary_material [file attachment]

ID Ensemble

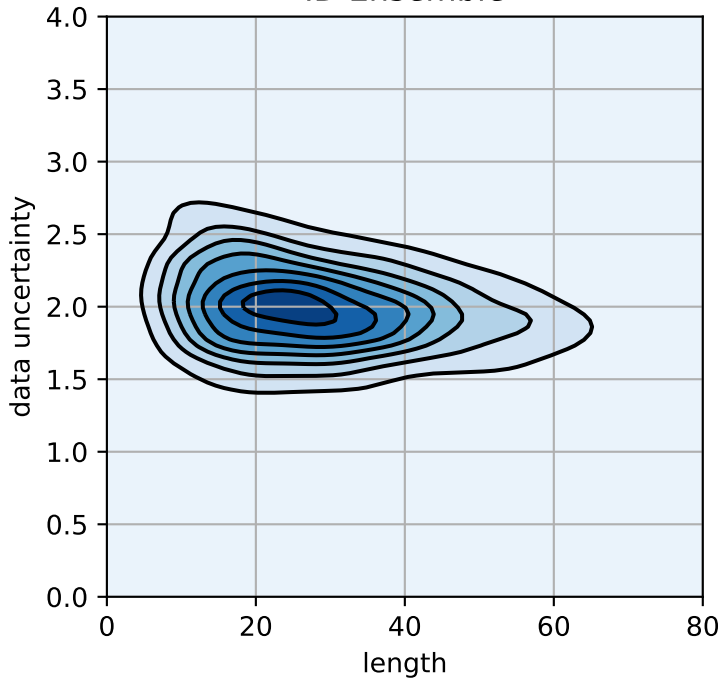

Supplement: supplementary_material [file attachment]

OOD Laplace

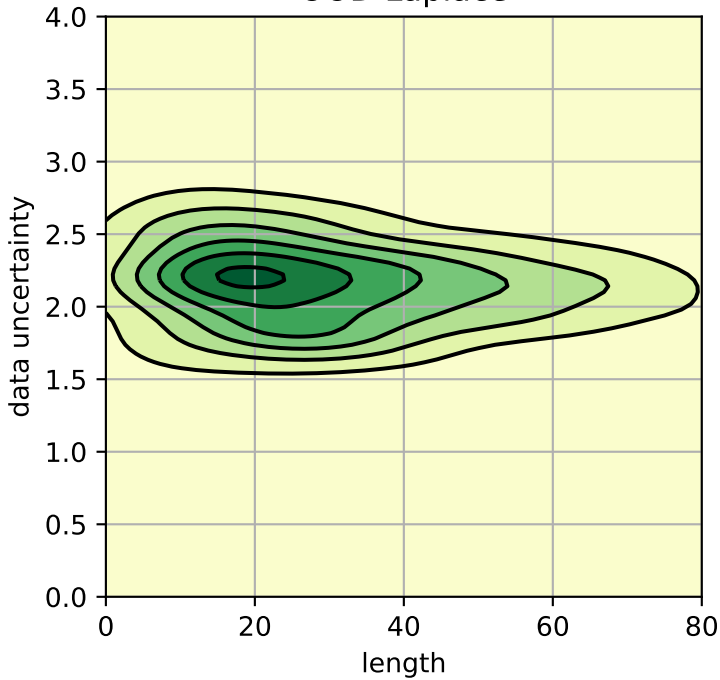

Supplement: supplementary_material [file attachment]

ID Ensemble

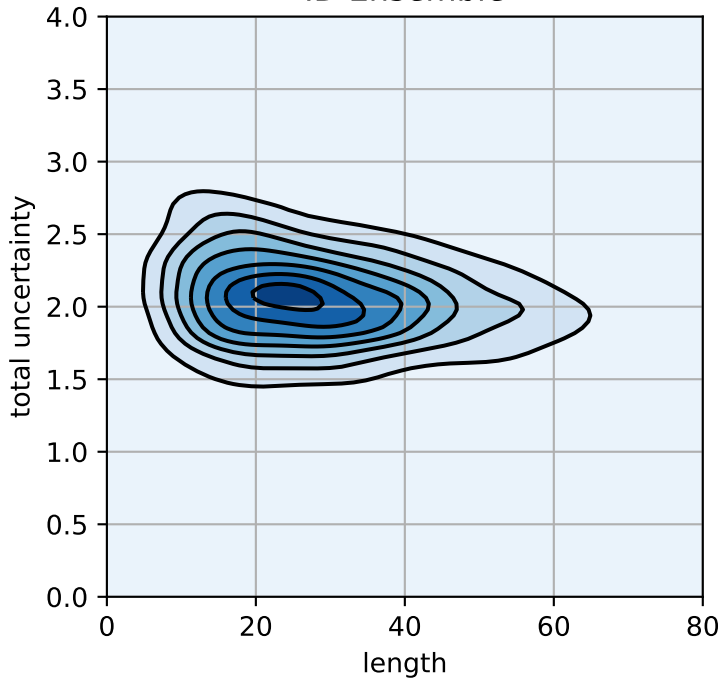

Supplement: supplementary_material [file attachment]

OOD Laplace



Supplement: supplementary_material [file attachment]

OOD Laplace

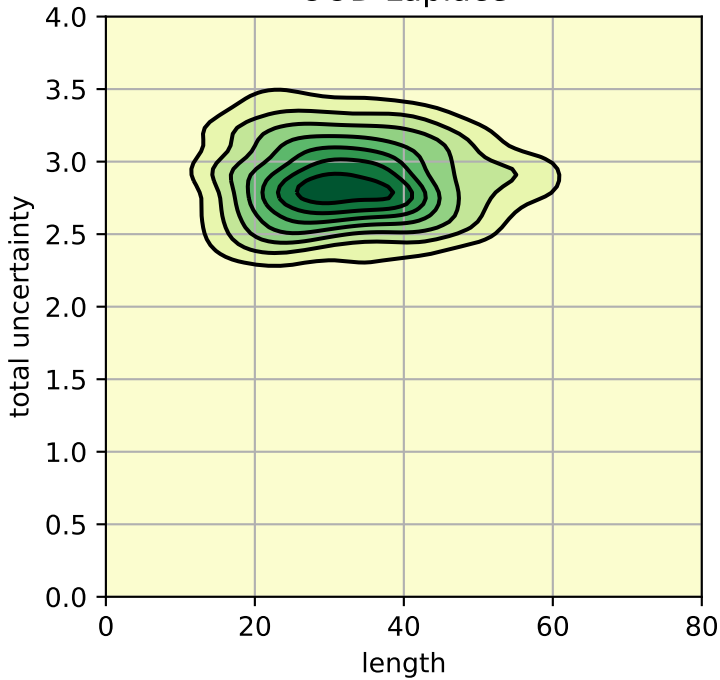

Supplement: supplementary_material [file attachment]

OOD Ensemble

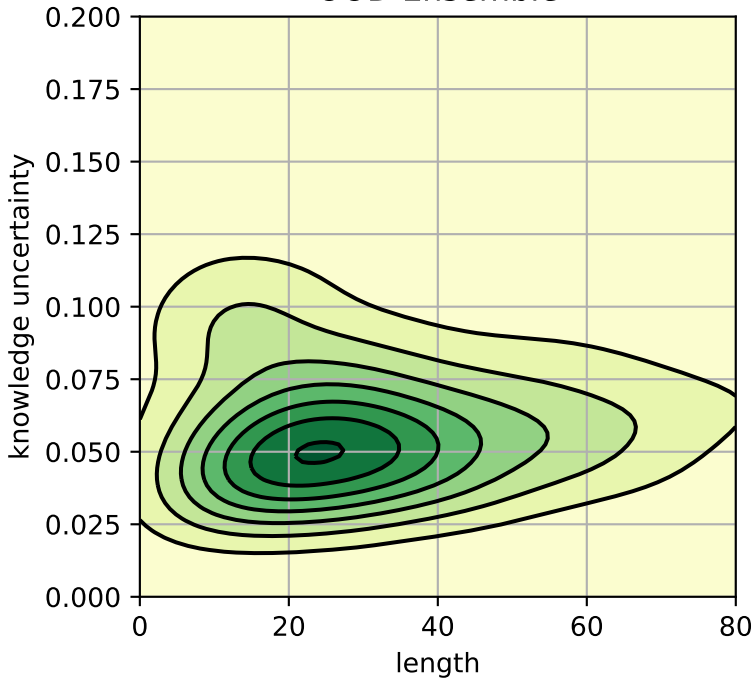

Supplement: supplementary_material [file attachment]

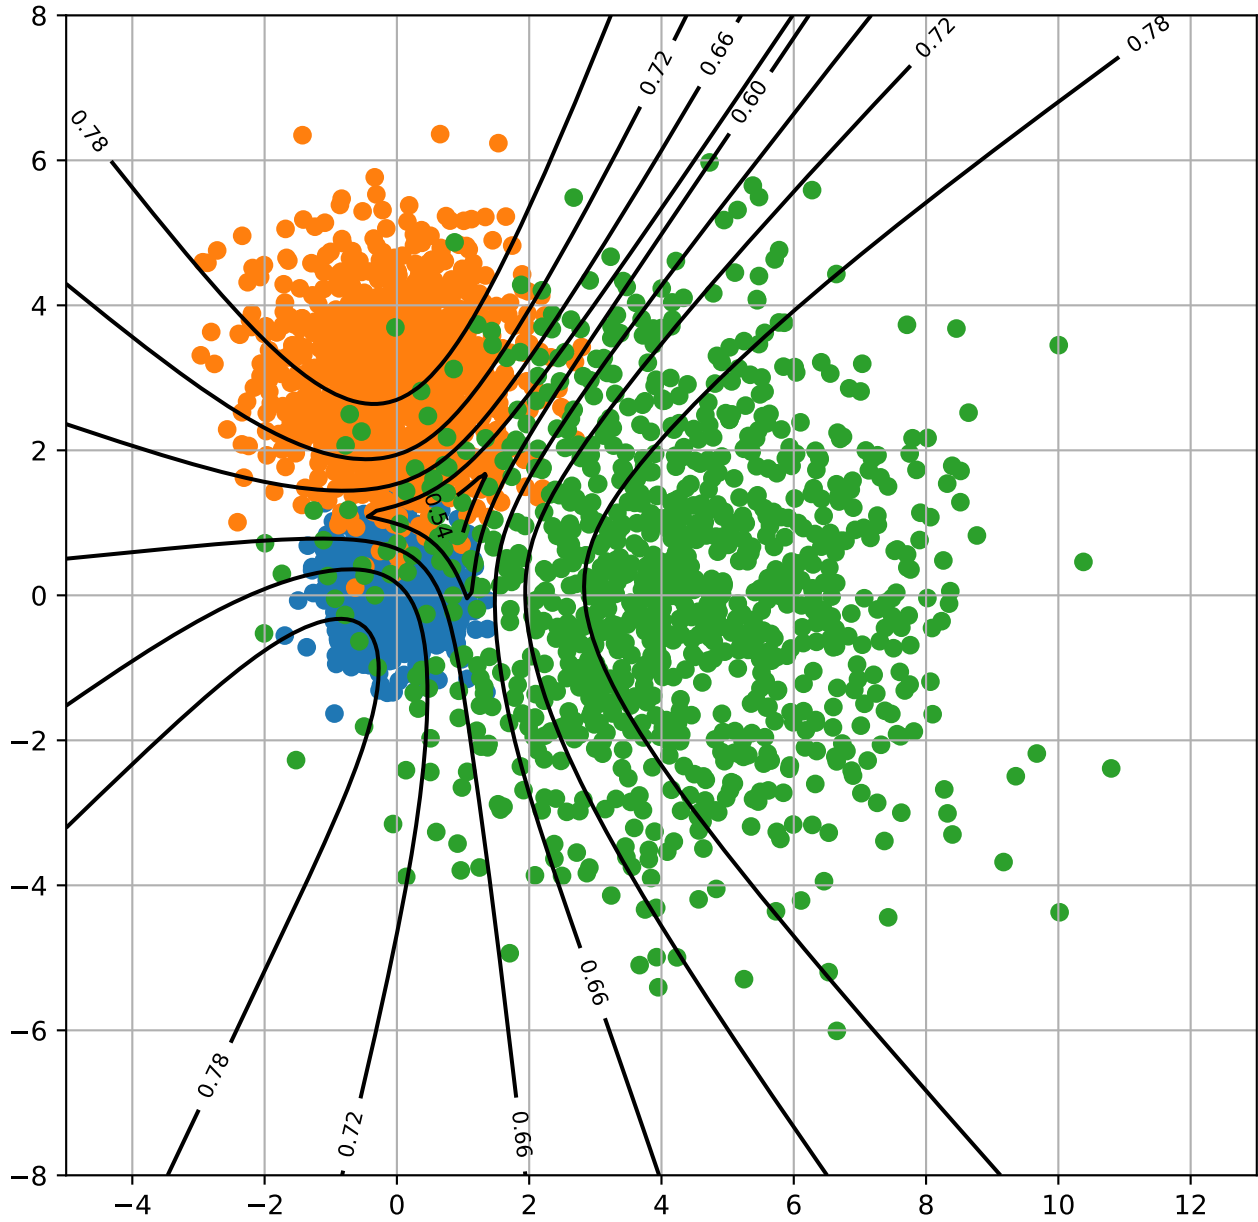

Supplement: supplementary_material [file attachment]

ID Laplace

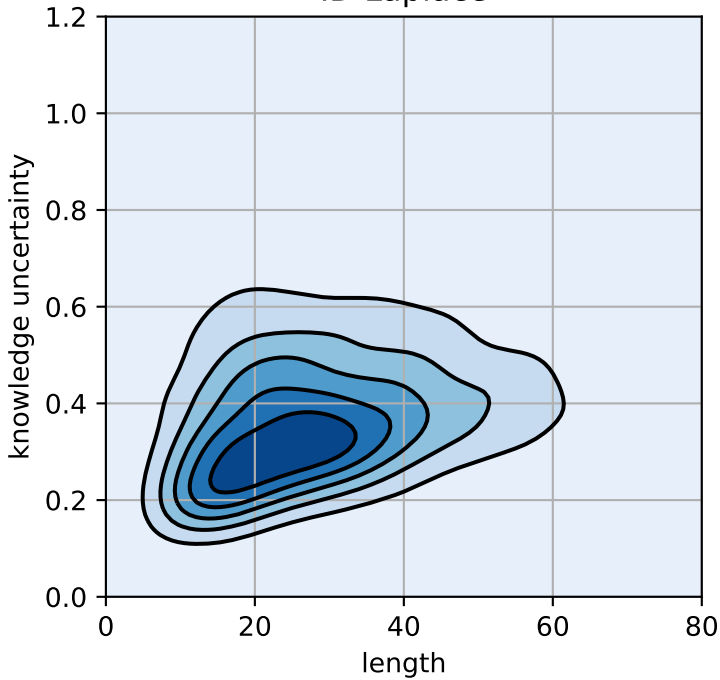

Supplement: supplementary_material [file attachment]

OOD Laplace



Supplement: supplementary_material [file attachment]

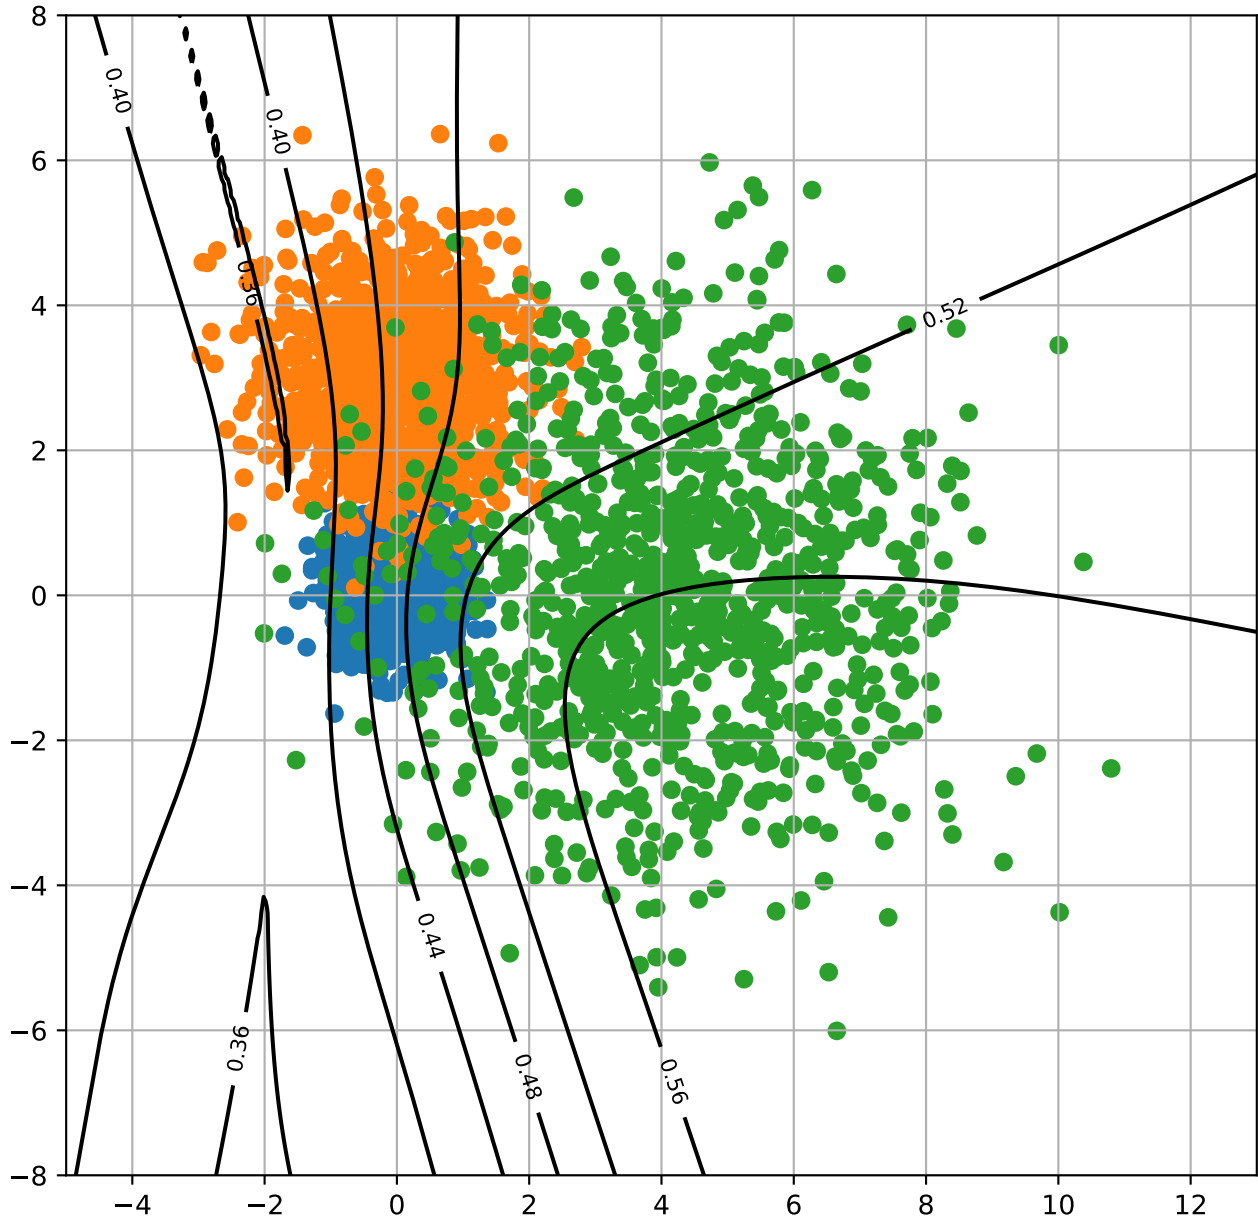

Supplement: supplementary_material [file attachment]

ID Ensemble

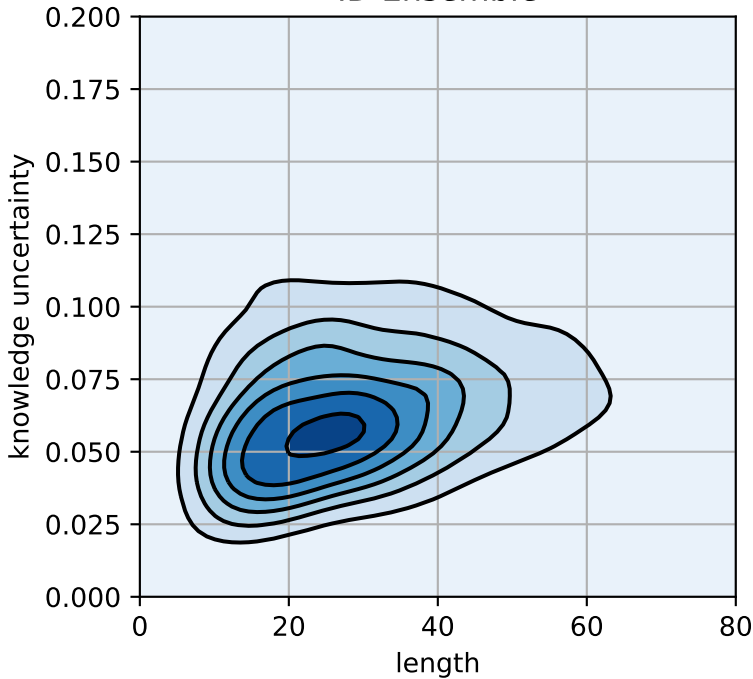

Supplement: supplementary_material [file attachment]

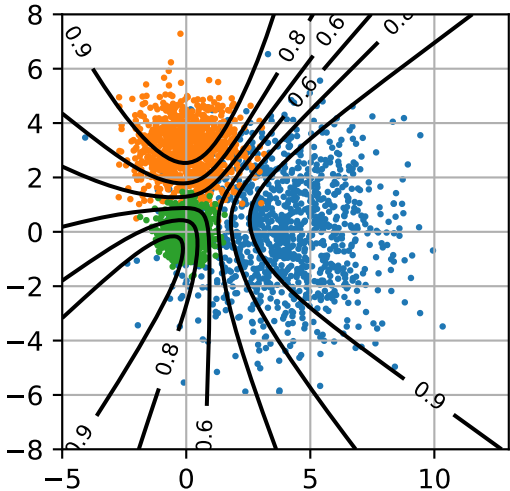

Supplement: supplementary_material [file attachment]

ID Laplace

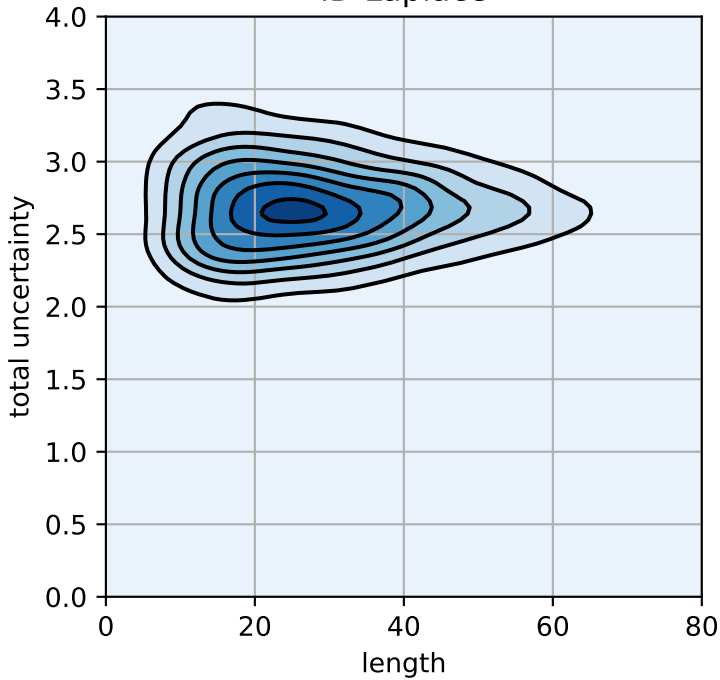

Supplement: supplementary_material [file attachment]

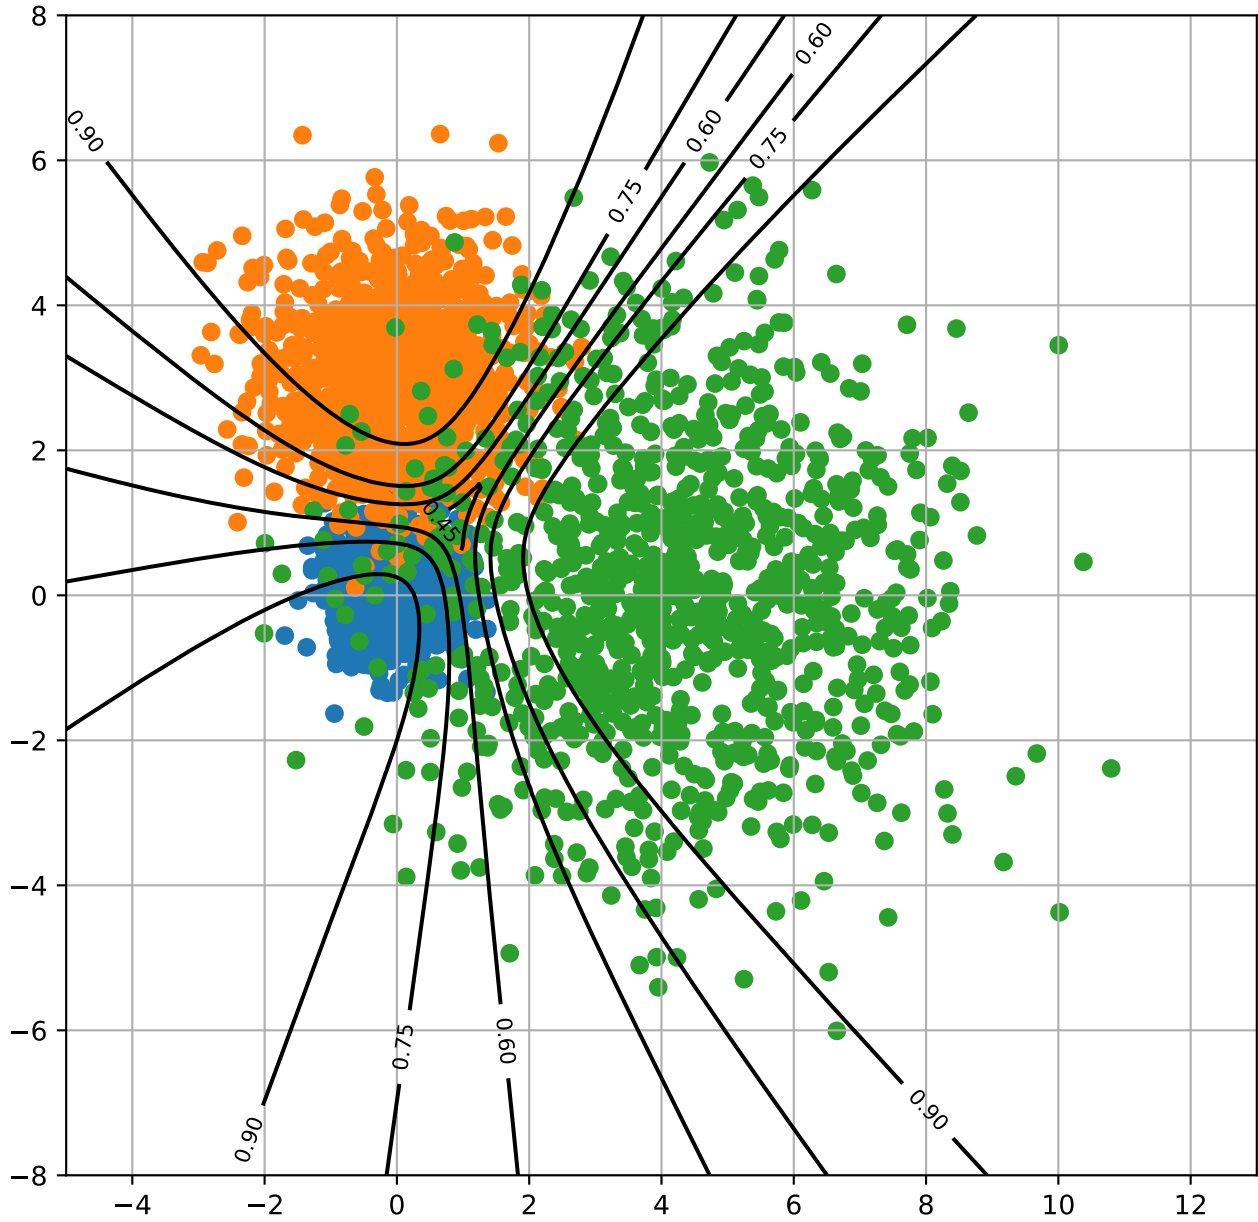

Supplement: supplementary_material [file attachment]

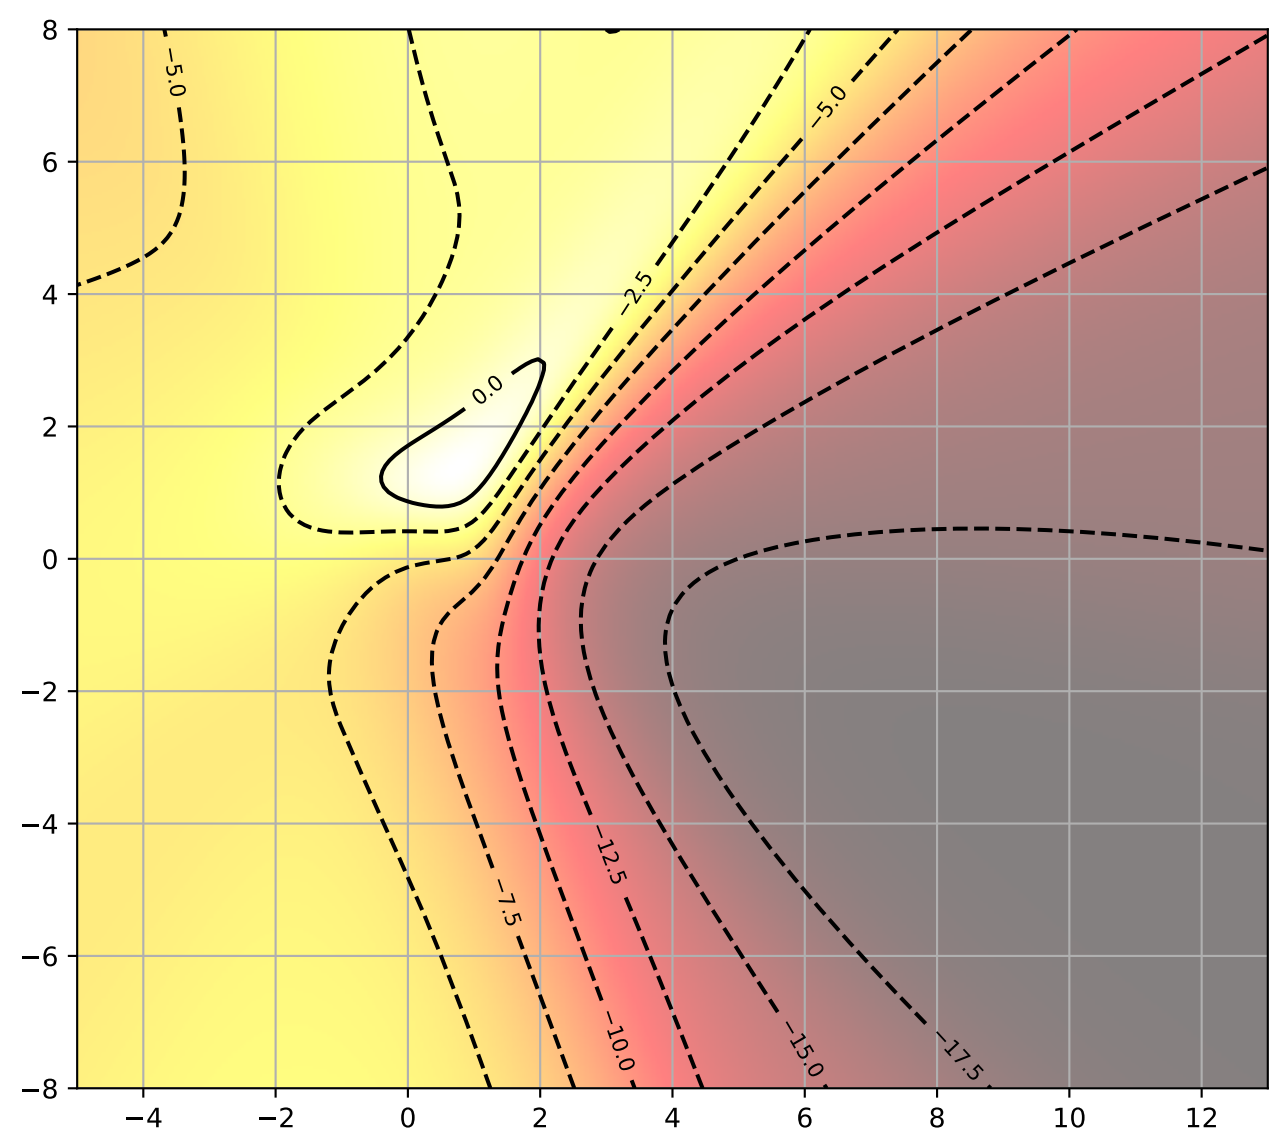

Supplement: supplementary_material [file attachment]

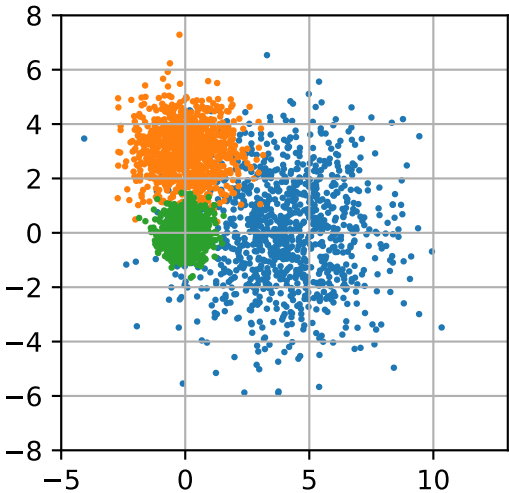

Supplement: supplementary_material [file attachment]

OOD Ensemble

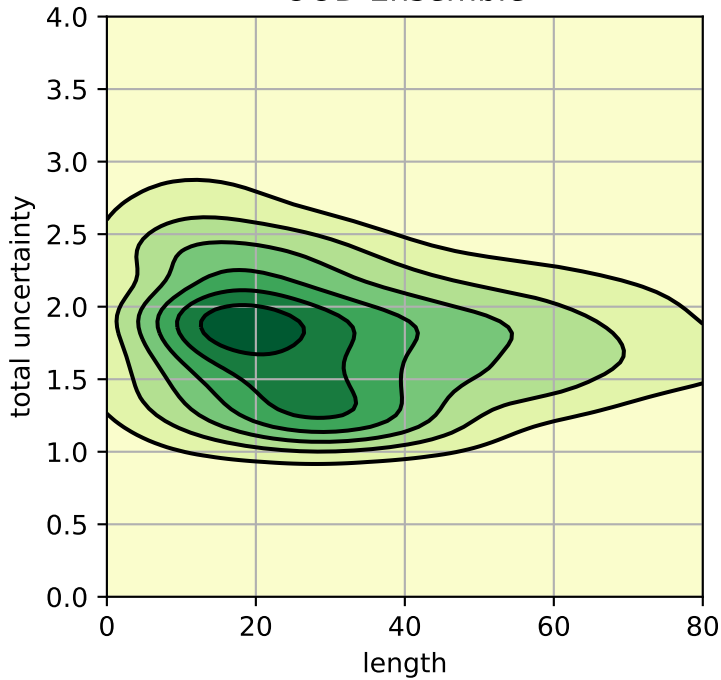

Supplement: supplementary_material [file attachment]

## OOD Ensemble

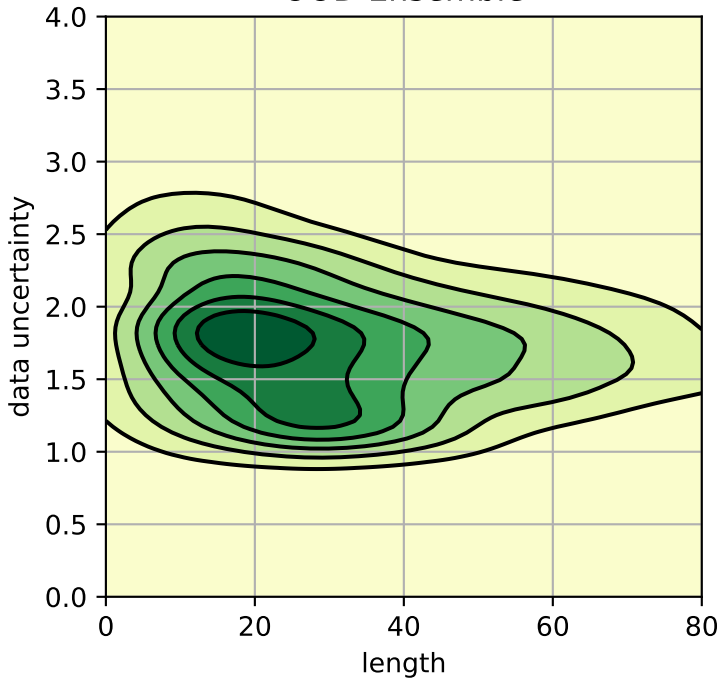

Supplement: supplementary_material [file attachment]

OOD Ensemble



Supplement: supplementary_material [file attachment]

## OOD Ensemble

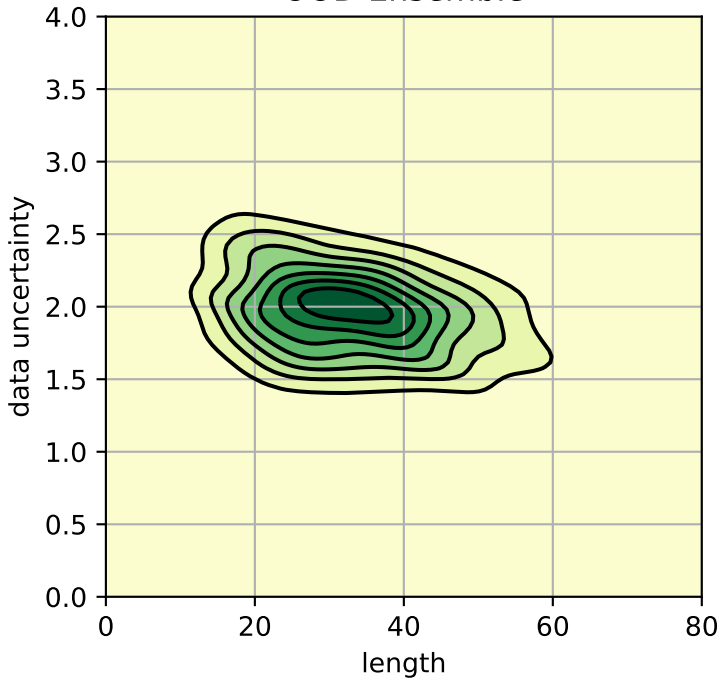

Supplement: supplementary_material [file attachment]

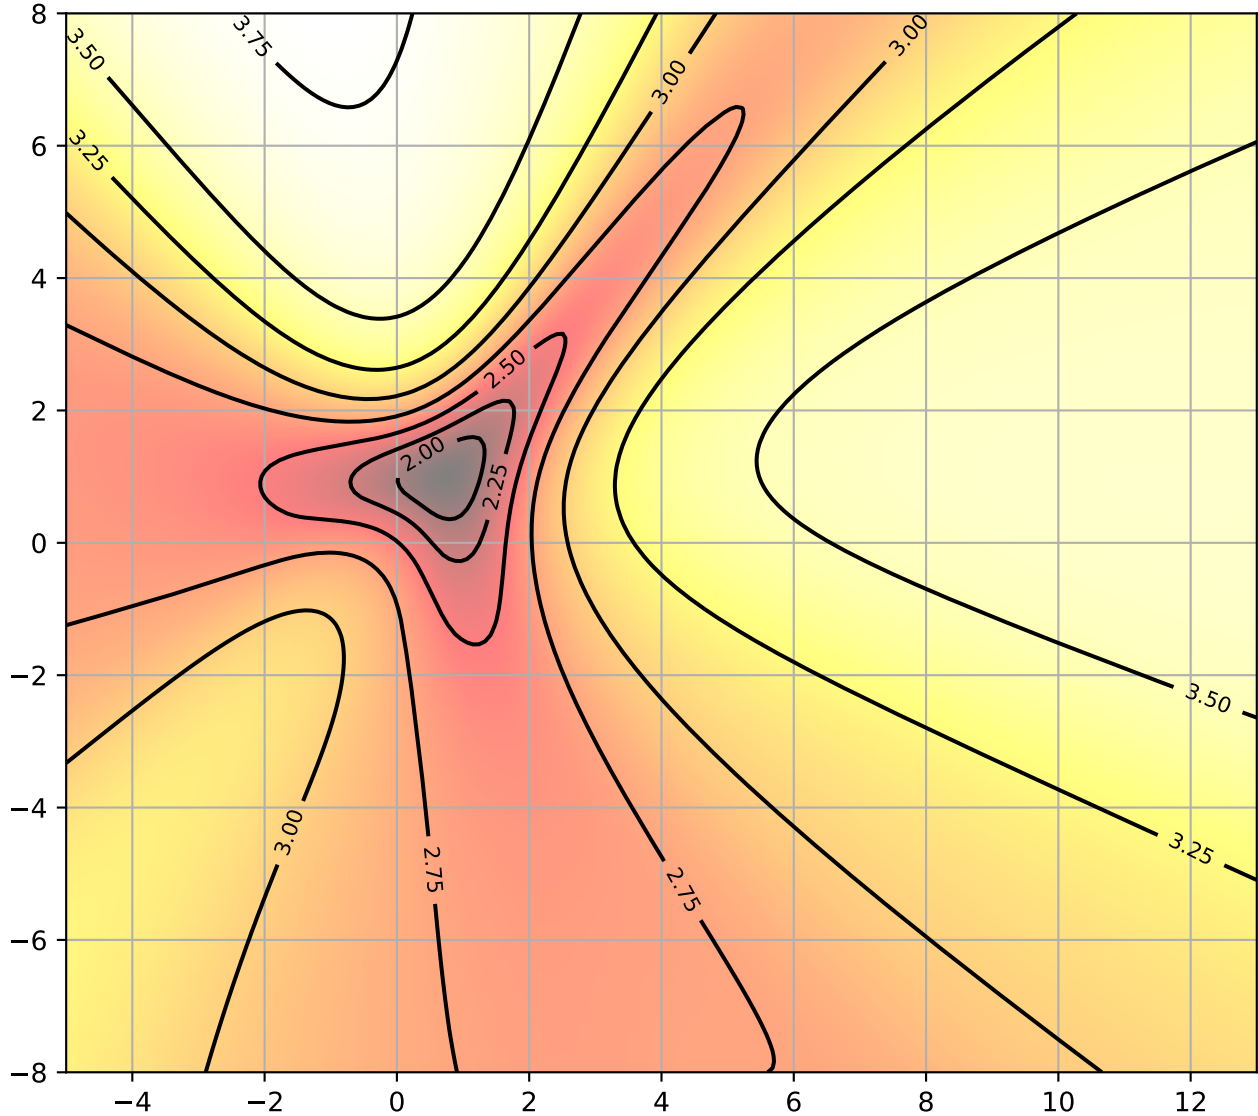

Supplement: supplementary_material [file attachment]

OOD Ensemble

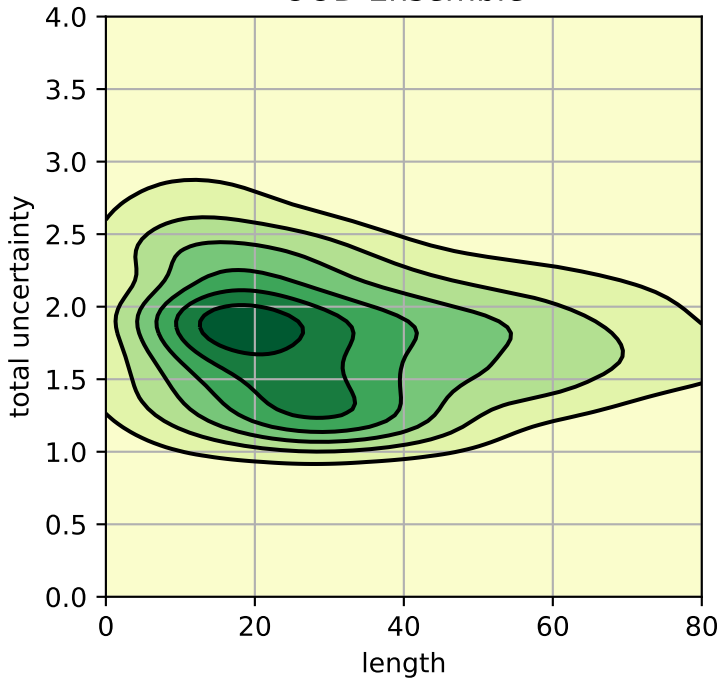

Supplement: supplementary_material [file attachment]

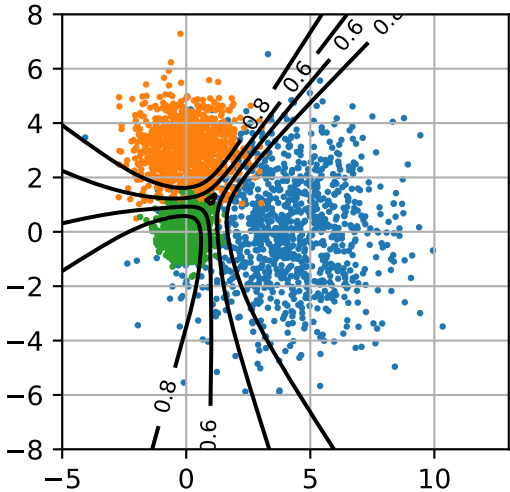

Supplement: supplementary_material [file attachment]

## OOD Ensemble

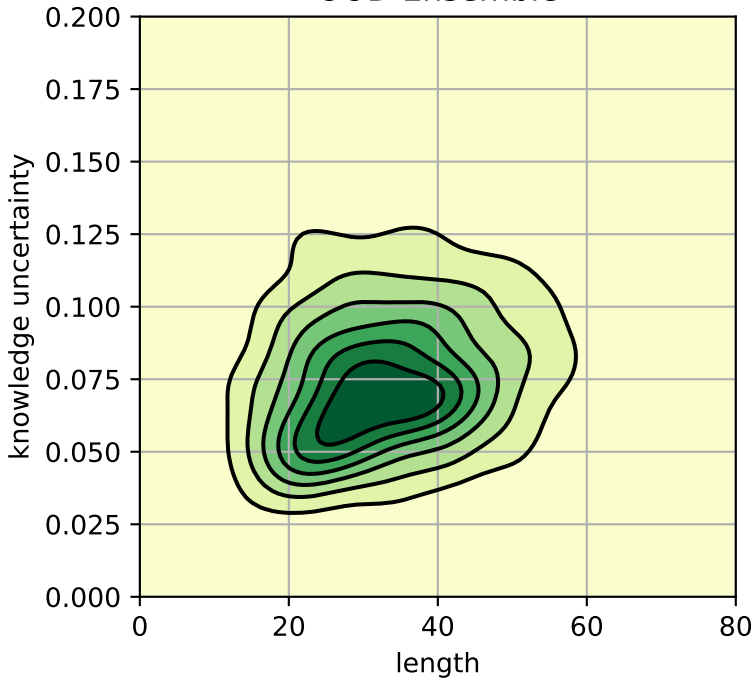

Supplement: supplementary_material [file attachment]

OOD Laplace

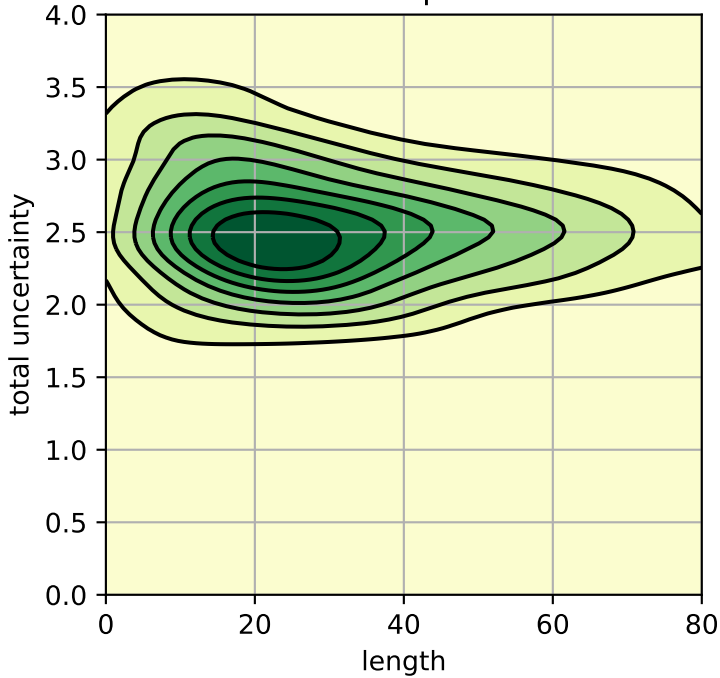

Supplement: supplementary_material [file attachment]

OOD Laplace

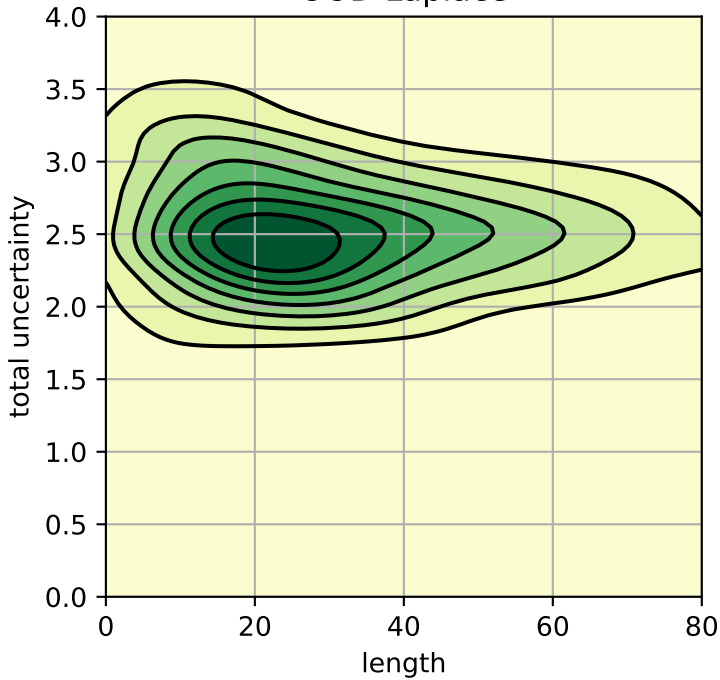

Supplement: supplementary_material [file attachment]

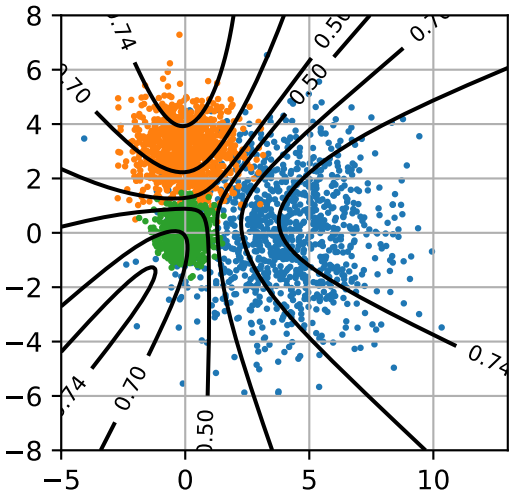

Supplement: supplementary_material [file attachment]

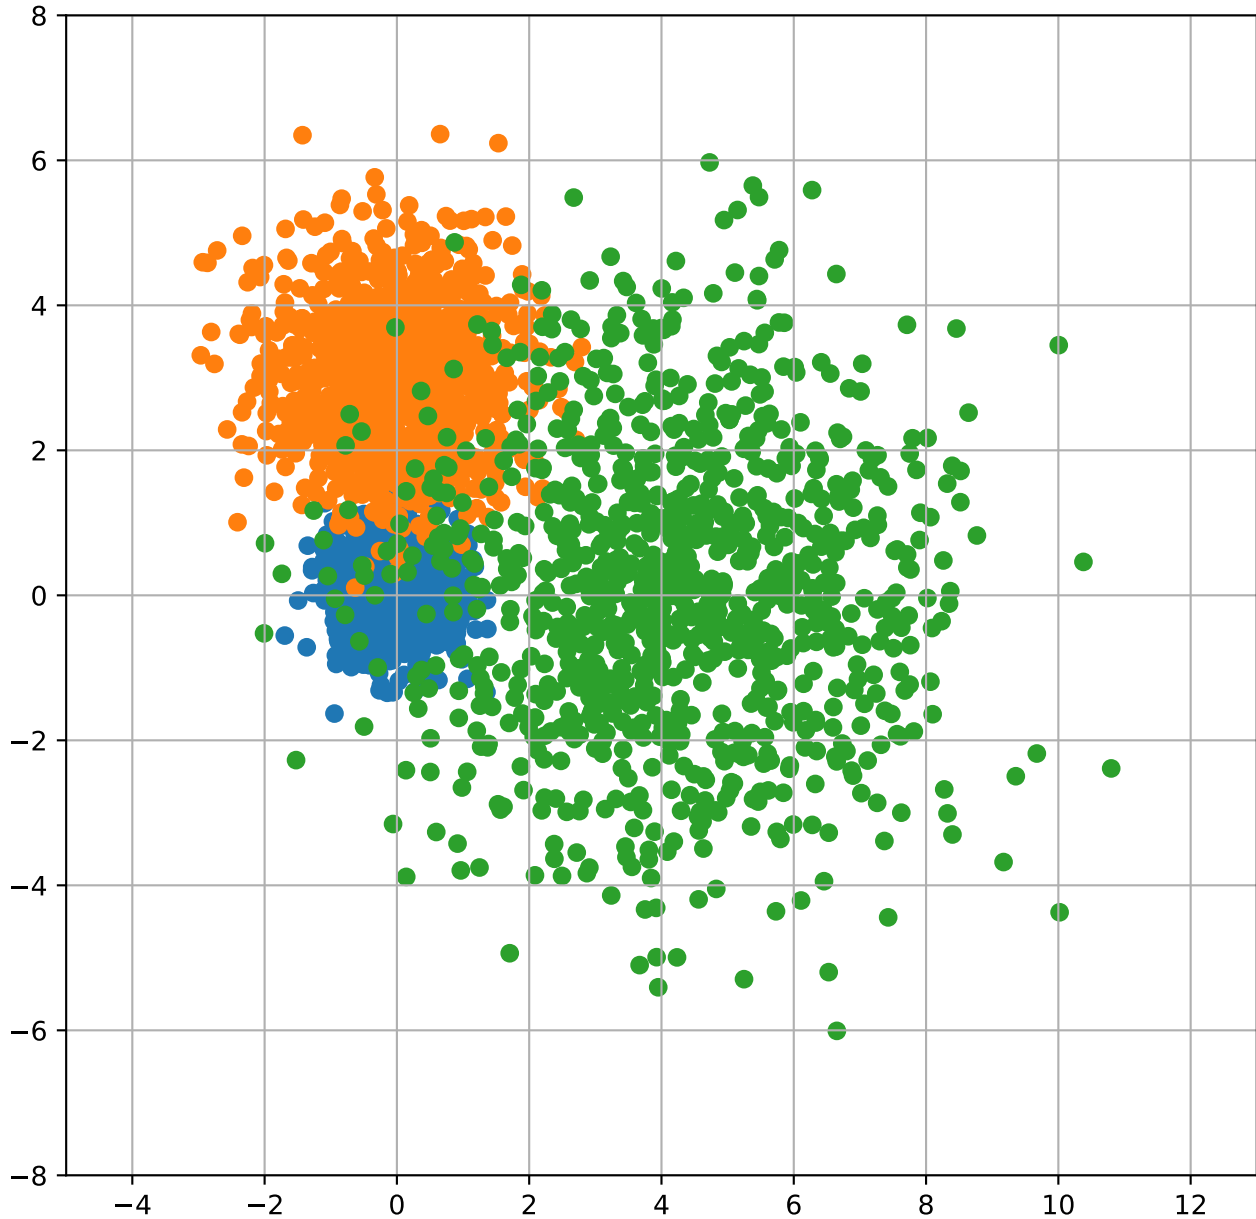

Supplement: supplementary_material [file attachment]
